# Supplementary material for: Pulse Consumption and Health Outcomes: A Scoping Review
Source: MDPI journal article supplement (doi:10.3390/nu16101435), 2024-05-09
Supplement: s1 [file s1]

## Supplemental Material File S1. Search History

### Database Summary

| Database                                                                                                       | Platform            | Years covered            | Date conducted | # results |
|----------------------------------------------------------------------------------------------------------------|---------------------|--------------------------|----------------|-----------|
| Medline                                                                                                        | PubMed              | 1946 - 2023              | 7/21/2023      | 3724      |
| Cochrane Library<br>Cochrane Database of Systematic Reviews,<br>Cochrane Central Register of Controlled Trials | Wiley               | Issue 7 of 12, July 2023 | 7/21/2023      | 1214      |
| EMBASE                                                                                                         | Elsevier            | 1974-2023                | 7/21/2023      | 3299      |
| Web of Science SCI-EXPANDED, SSCI, AHCI, CPCI-S, CPCI-SSH, BKCI-S, BKCI-SSH, ESCI                              | Clarivate Analytics | 1900-2023                | 7/21/2023      | 5603      |
| Total                                                                                                          |                     |                          |                | 13840     |
| With duplicates removed                                                                                        |                     |                          |                | 8697      |

### PubMed

|    |                                                                                                                                                                                                                                                                                                                                                                                                                                                                                                                                                                                                         |         |
|----|---------------------------------------------------------------------------------------------------------------------------------------------------------------------------------------------------------------------------------------------------------------------------------------------------------------------------------------------------------------------------------------------------------------------------------------------------------------------------------------------------------------------------------------------------------------------------------------------------------|---------|
| #3 | #1 AND #2                                                                                                                                                                                                                                                                                                                                                                                                                                                                                                                                                                                               | 3724    |
| #2 | "Health Status"[Majr] OR "Cardiovascular Diseases"[Majr] OR "Diabetes Mellitus"[Majr] OR "Body Weight"[Majr] OR Health Outcome*[ti] OR Health Status[ti] OR Health Effect*[ti] OR Cardiovascular[ti] OR Cardiac[ti] OR Heart Disease*[ti] OR Blood Pressure[ti] OR Diabetes[ti] OR Blood Glucose[ti] OR Insulin Resistance[ti] OR Obesity[ti] OR Body Mass Index[ti] OR Bmi[ti] OR Weight[ti]                                                                                                                                                                                                           | 3440688 |
| #1 | ((("Vigna"[Mesh] OR "Fabaceae"[Mesh:NoExp]) AND ("Diet"[MeSH] OR "Eating"[Mesh])) OR (Pulse*[tiab] OR Legume*[tiab] OR Bean*[tiab] OR Lentil*[tiab] OR Dry pea*[tiab] OR Chickpea*[tiab] OR Cow pea*[tiab] OR Cowpea*[tiab] OR Black eyed pea*[tiab] OR Blackeyed pea*[tiab] OR Black gram*[tiab] OR Masha[tiab] OR Vigna radiata[tiab] OR Vigna aconitifolia[tiab] OR Vigna angularis[tiab] OR Vigna unguiculata[tiab] OR Vigna mungo[tiab] OR Phaseolus mungo[tiab] OR Vigna umbellata[tiab])) AND (intake[tiab] OR Consumption[tiab] OR Diet[tiab] OR Ingestion[tiab] OR Eat[tiab] OR Eating[tiab])) | 17159   |

| History and Search Details |         |         |                                                                                                                                                                                                                                                                                                                                                                                                                                                                                                                                                                                                                                    |           | Download | Delete |
|----------------------------|---------|---------|------------------------------------------------------------------------------------------------------------------------------------------------------------------------------------------------------------------------------------------------------------------------------------------------------------------------------------------------------------------------------------------------------------------------------------------------------------------------------------------------------------------------------------------------------------------------------------------------------------------------------------|-----------|----------|--------|
| Search                     | Actions | Details | Query                                                                                                                                                                                                                                                                                                                                                                                                                                                                                                                                                                                                                              | Results   | Time     |        |
| #3                         | ...     | >       | Search: #1 AND #2 Sort by: Most Recent                                                                                                                                                                                                                                                                                                                                                                                                                                                                                                                                                                                             | 3,724     | 15:04:35 |        |
| #2                         | ...     | >       | Search: "Health Status"[Majr] OR "Cardiovascular Diseases"[Majr] OR "Diabetes Mellitus"[Majr] OR "Body Weight"[Majr] OR Health Outcome*[ti] OR Health Status[ti] OR Health Effect*[ti] OR Cardiovascular[ti] OR Cardiac[ti] OR Heart Disease*[ti] OR Blood Pressure[ti] OR Diabetes[ti] OR Blood Glucose[ti] OR Insulin Resistance[ti] OR Obesity[ti] OR Body Mass Index[ti] OR Bmi[ti] OR Weight[ti] Sort by: Most Recent                                                                                                                                                                                                         | 3,440,688 | 15:03:47 |        |
| #1                         | ...     | >       | Search: (("Vigna"[Mesh] OR "Fabaceae"[Mesh:NoExp]) AND ("Diet"[MeSH] OR "Eating"[Mesh])) OR (Pulse*[tiab] OR Legume*[tiab] OR Bean*[tiab] OR Lentil*[tiab] OR Dry pea*[tiab] OR Chickpea*[tiab] OR Cow pea*[tiab] OR Cowpea*[tiab] OR Black eyed pea*[tiab] OR Blackeyed pea*[tiab] OR Black gram*[tiab] OR Masha[tiab] OR Vigna radiata[tiab] OR Vigna aconitifolia[tiab] OR Vigna angularis[tiab] OR Vigna unguiculata[tiab] OR Vigna mungo[tiab] OR Phaseolus mungo[tiab] OR Vigna umbellata[tiab]) AND (intake[tiab] OR Consumption[tiab] OR Diet[tiab] OR Ingestion[tiab] OR Eat[tiab] OR Eating[tiab])) Sort by: Most Recent | 17,159    | 15:03:38 |        |

Showing 1 to 3 of 3 entries

## Embase

|    |                                                                                                                                                                                                                                                                                                                                                                                                                                                                                                                                                                                                                     |         |
|----|---------------------------------------------------------------------------------------------------------------------------------------------------------------------------------------------------------------------------------------------------------------------------------------------------------------------------------------------------------------------------------------------------------------------------------------------------------------------------------------------------------------------------------------------------------------------------------------------------------------------|---------|
| #5 | #3 and #4                                                                                                                                                                                                                                                                                                                                                                                                                                                                                                                                                                                                           | 3299    |
| #4 | 'health status'/mj OR 'cardiovascular disease'/mj OR 'diabetes mellitus'/mj OR 'body weight'/mj OR 'health outcome*':ti OR 'health status':ti OR 'health effect*':ti OR cardiovascular:ti OR cardiac:ti OR 'heart disease*':ti OR 'blood pressure':ti OR diabetes:ti OR 'blood glucose':ti OR 'insulin resistance':ti OR obesity:ti OR 'body mass index':ti OR bmi:ti OR weight:ti                                                                                                                                                                                                                                  | 1662691 |
| #3 | #1 OR #2                                                                                                                                                                                                                                                                                                                                                                                                                                                                                                                                                                                                            | 23661   |
| #2 | (pulse*:ti,ab,kw OR legume*:ti,ab,kw OR bean*:ti,ab,kw OR lentil*:ti,ab,kw OR 'dry pea*':ti,ab,kw OR chickpea*:ti,ab,kw OR 'cow pea*':ti,ab,kw OR cowpea*:ti,ab,kw OR 'black eyed pea*':ti,ab,kw OR 'blackeyed pea*':ti,ab,kw OR 'black gram*':ti,ab,kw OR masha:ti,ab,kw OR 'vigna radiata':ti,ab,kw OR 'vigna aconitifolia':ti,ab,kw OR 'vigna angularis':ti,ab,kw OR 'vigna unguiculata':ti,ab,kw OR 'vigna mungo':ti,ab,kw OR 'phaseolus mungo':ti,ab,kw OR 'vigna umbellata':ti,ab,kw) AND (intake:ti,ab,kw OR consumption:ti,ab,kw OR diet:ti,ab,kw OR ingestion:ti,ab,kw OR eat:ti,ab,kw OR eating:ti,ab,kw) | 23438   |
| #1 | ('vigna'/exp OR 'fabaceae'/de) AND ('eating'/exp OR 'diet'/exp)                                                                                                                                                                                                                                                                                                                                                                                                                                                                                                                                                     | 493     |

|                                  |                                                                                                                                                                                                                                                                                                                                                                                                                                                                                                                                                                                                                     |           |                                                                     |
|----------------------------------|---------------------------------------------------------------------------------------------------------------------------------------------------------------------------------------------------------------------------------------------------------------------------------------------------------------------------------------------------------------------------------------------------------------------------------------------------------------------------------------------------------------------------------------------------------------------------------------------------------------------|-----------|---------------------------------------------------------------------|
| <input type="checkbox"/> History | Save   Delete   Print view   Export   Email                                                                                                                                                                                                                                                                                                                                                                                                                                                                                                                                                                         | Combine > | using <input checked="" type="radio"/> And <input type="radio"/> Or |
| <input type="checkbox"/> #5      | #3 AND #4                                                                                                                                                                                                                                                                                                                                                                                                                                                                                                                                                                                                           |           |                                                                     |
| <input type="checkbox"/> #4      | 'health status'/mj OR 'cardiovascular disease'/mj OR 'diabetes mellitus'/mj OR 'body weight'/mj OR 'health outcome*':ti OR 'health status':ti OR 'health effect*':ti OR cardiovascular:ti OR cardiac:ti OR 'heart disease*':ti OR 'blood pressure':ti OR diabetes:ti OR 'blood glucose':ti OR 'insulin resistance':ti OR obesity:ti OR 'body mass index':ti OR bmi:ti OR weight:ti                                                                                                                                                                                                                                  |           |                                                                     |
| <input type="checkbox"/> #3      | #1 OR #2                                                                                                                                                                                                                                                                                                                                                                                                                                                                                                                                                                                                            |           |                                                                     |
| <input type="checkbox"/> #2      | (pulse*:ti,ab,kw OR legume*:ti,ab,kw OR bean*:ti,ab,kw OR lentil*:ti,ab,kw OR 'dry pea*':ti,ab,kw OR chickpea*:ti,ab,kw OR 'cow pea*':ti,ab,kw OR cowpea*:ti,ab,kw OR 'black eyed pea*':ti,ab,kw OR 'blackeyed pea*':ti,ab,kw OR 'black gram*':ti,ab,kw OR masha:ti,ab,kw OR 'vigna radiata':ti,ab,kw OR 'vigna aconitifolia':ti,ab,kw OR 'vigna angularis':ti,ab,kw OR 'vigna unguiculata':ti,ab,kw OR 'vigna mungo':ti,ab,kw OR 'phaseolus mungo':ti,ab,kw OR 'vigna umbellata':ti,ab,kw) AND (intake:ti,ab,kw OR consumption:ti,ab,kw OR diet:ti,ab,kw OR ingestion:ti,ab,kw OR eat:ti,ab,kw OR eating:ti,ab,kw) |           |                                                                     |
| <input type="checkbox"/> #1      | ('vigna'/exp OR 'fabaceae'/de) AND ('eating'/exp OR 'diet'/exp)                                                                                                                                                                                                                                                                                                                                                                                                                                                                                                                                                     |           |                                                                     |

## Web of Science

|    |                                                                                                                                                                                                                                                                                                                                                                                                                                                                                                                                                                                                                                                |      |
|----|------------------------------------------------------------------------------------------------------------------------------------------------------------------------------------------------------------------------------------------------------------------------------------------------------------------------------------------------------------------------------------------------------------------------------------------------------------------------------------------------------------------------------------------------------------------------------------------------------------------------------------------------|------|
| #1 | ((Pulse* OR Legume* OR Bean* OR Lentil* OR "Dry pea*" OR Chickpea* OR "Cow pea*" OR Cowpea* OR "Black eyed pea*" OR "Blackeyed pea*" OR "Black gram*" OR Masha OR "Vigna radiata" OR "Vigna aconitifolia" OR "Vigna angularis" OR "Vigna unguiculata" OR "Vigna mungo" OR "Phaseolus mungo" OR "Vigna umbellata") AND (intake OR Consumption OR Diet OR Ingestion OR Eat OR Eating)) (Topic) and "Health Outcome*" OR "Health Status" OR "Health Effect*" OR Cardiovascular OR Cardiac OR "Heart Disease*" OR "Blood Pressure" OR Diabetes OR "Blood Glucose" OR "Insulin Resistance" OR Obesity OR "Body Mass Index" OR Bmi OR Weight (Title) | 5603 |
|----|------------------------------------------------------------------------------------------------------------------------------------------------------------------------------------------------------------------------------------------------------------------------------------------------------------------------------------------------------------------------------------------------------------------------------------------------------------------------------------------------------------------------------------------------------------------------------------------------------------------------------------------------|------|

Type

Search Query and Results

Database

Results

Actions

Current session

Export

☐ Search

((Pulse\* OR Legume\* OR Bean\* OR Lentil\* OR "Dry pea\*" OR Chickpea\* OR "Cow pea\*" OR Cowpea\* OR "Black eyed pea\*" OR "Blackeyed pea\*" OR "Black gram\*" OR Masha OR "Vigna radiata" OR "Vigna aconitifolia" OR "Vigna angularis" OR "Vigna unguiculata" OR "Vigna mungo" OR "Phaseolus mungo" OR "Vigna umbellata") AND (intake OR Consumption OR Diet OR Ingestion OR Eat OR Eating)) (Topic) and "Health Outcome\*" OR "Health Status" OR "Health Effect\*" OR Cardiovascular OR Cardiac OR "Heart Disease\*" OR "Blood Pressure" OR Diabetes OR

All Databases 5,603  
[Show collections](#)

3:09 PM

## Cochrane

|    |                                                                                                                                                                                                                                                                                                                                                                                                                                                                                                                                                                                                                                                                                                     |      |
|----|-----------------------------------------------------------------------------------------------------------------------------------------------------------------------------------------------------------------------------------------------------------------------------------------------------------------------------------------------------------------------------------------------------------------------------------------------------------------------------------------------------------------------------------------------------------------------------------------------------------------------------------------------------------------------------------------------------|------|
| #1 | (Pulse* OR Legume* OR Bean* OR Lentil* OR Dry NEXT pea* OR Chickpea* OR Cow NEXT pea* OR Cowpea* OR Black NEXT eyed NEXT pea* OR Blackeyed NEXT pea* OR Black NEXT gram* OR Masha OR "Vigna radiata" OR "Vigna aconitifolia" OR "Vigna angularis" OR "Vigna unguiculata" OR "Vigna mungo" OR "Phaseolus mungo" OR "Vigna umbellata") AND (intake OR Consumption OR Diet OR Ingestion OR Eat OR Eating) in Title Abstract Keyword AND Health NEXT Outcome* OR "Health Status" OR Health NEXT Effect* OR Cardiovascular OR Cardiac OR Heart NEXT Disease* OR "Blood Pressure" OR Diabetes OR "Blood Glucose" OR "Insulin Resistance" OR Obesity OR "Body Mass Index" OR Bmi OR Weight in Record Title | 1214 |
|----|-----------------------------------------------------------------------------------------------------------------------------------------------------------------------------------------------------------------------------------------------------------------------------------------------------------------------------------------------------------------------------------------------------------------------------------------------------------------------------------------------------------------------------------------------------------------------------------------------------------------------------------------------------------------------------------------------------|------|

|                        |                         |                |                 |                          |                       |           |
|------------------------|-------------------------|----------------|-----------------|--------------------------|-----------------------|-----------|
| Cochrane Reviews<br>16 | Cochrane Protocols<br>0 | Trials<br>1198 | Editorials<br>0 | Special Collections<br>0 | Clinical Answers<br>0 | More<br>▼ |
|------------------------|-------------------------|----------------|-----------------|--------------------------|-----------------------|-----------|

**16** Cochrane Reviews matching (Pulse\* OR Legume\* OR Bean\* OR Lentil\* OR Dry NEXT pea\* OR Chickpea\* OR Cow NEXT pea\* OR Cowpea\* OR Black NEXT eyed NEXT pea\* OR Blackeyed NEXT pea\* OR Black NEXT gram\* OR Masha OR "Vigna radiata" OR "Vigna aconitifolia" OR "Vigna angularis" OR "Vigna unguiculata" OR "Vigna mungo" OR "Phaseolus mungo" OR "Vigna umbellata") AND (intake OR Consumption OR Diet OR Ingestion OR Eat OR Eating) in Title Abstract Keyword AND Health NEXT Outcome\* OR "Health Status" OR Health NEXT Effect\* OR Cardiovascular OR Cardiac OR Heart NEXT Disease\* OR "Blood Pressure" OR Diabetes OR "Blood Glucose" OR "Insulin Resistance" OR Obesity OR "Body Mass Index" OR Bmi OR Weight in Record Title - (Word variations have been searched)

[Cochrane Database of Systematic Reviews](#)  
Issue 7 of 12, July 2023
